# Supplementary material
Source: PubMed Central journal article supplement (PMC3923431)
Supplement: NIHMS525367-supplement-supplement_1.pdf [file NIHMS525367-supplement-supplement_1.pdf]

**Supplementary Figure, Dilworth et al.**

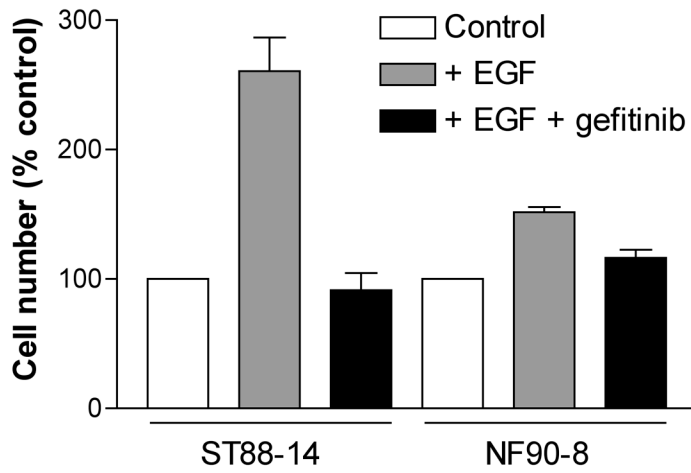

Gefitinib blocks EGF-driven proliferation of NF1 MPNST cell lines. Cultures of cells growing in restricted (0.1%) serum were treated as shown for 6 days with 10 ng/ml EGF, 1  $\mu$ M gefitinib, or vehicle control. Viable cells were then counted by exclusion of Trypan blue.
